# Supplementary material for: Synthesis of metal–carbon core–shell nanoparticles by RAPET (Reaction under Autogenic Pressure at Elevated Temperatures)
Source: Royal Society of Chemistry journal article supplement (doi:10.1039/c1nj20627c), 2011-11-17
Supplement: c1nj20627c.pdf [file c1nj20627c.pdf]

## Supporting Information

### Synthesis of Metal-Carbon Core-Shell Nanoparticles by RAPET (Reaction under Autogenic Pressure at Elevated Temperatures)

Evgeny Butovsky, Alexander Irzh, Boris Markovsky and Aharon Gedanken\*

\*Department of Chemistry and Kanbar Laboratory for Nanomaterials  
at the Bar-Ilan University Center for Advanced Materials  
and Nanotechnology, Bar-Ilan University,  
Ramat-Gan 52900, Israel  
Fax: +972-3-738-4053  
E-mail: gedanken@mail.biu.ac.il

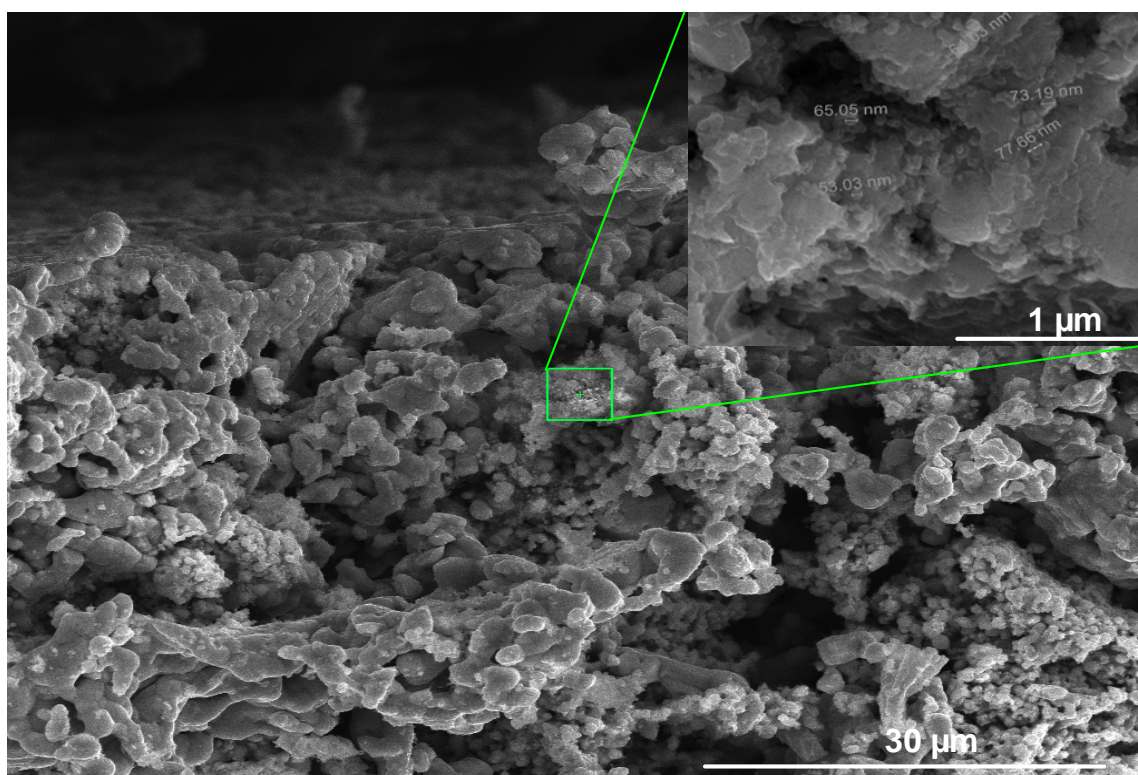

Figure 1S. SEM micrographs of pellet after the pelletizing.

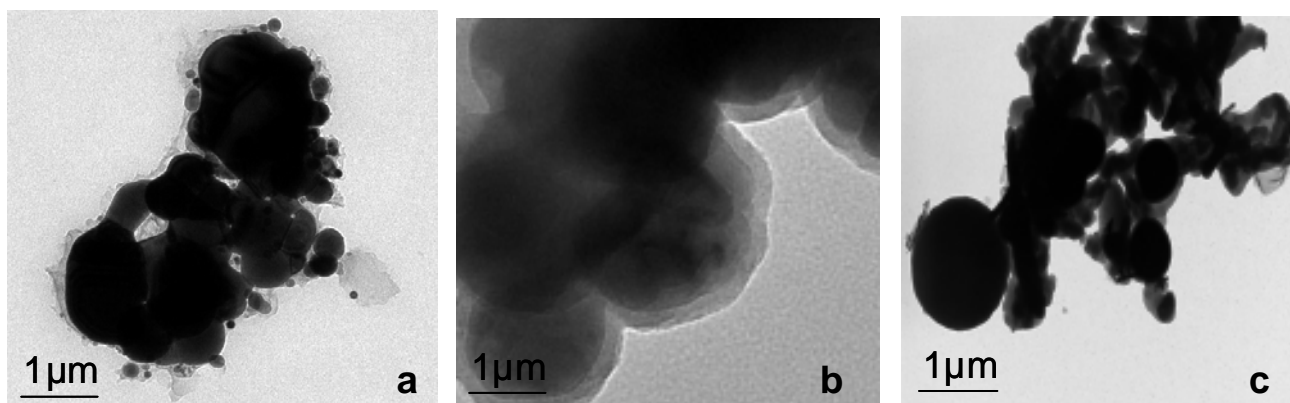

Figure 2S. TEM micrographs of carbon-coated aggregates of  
a) Ag, b) Cu, c) Pb

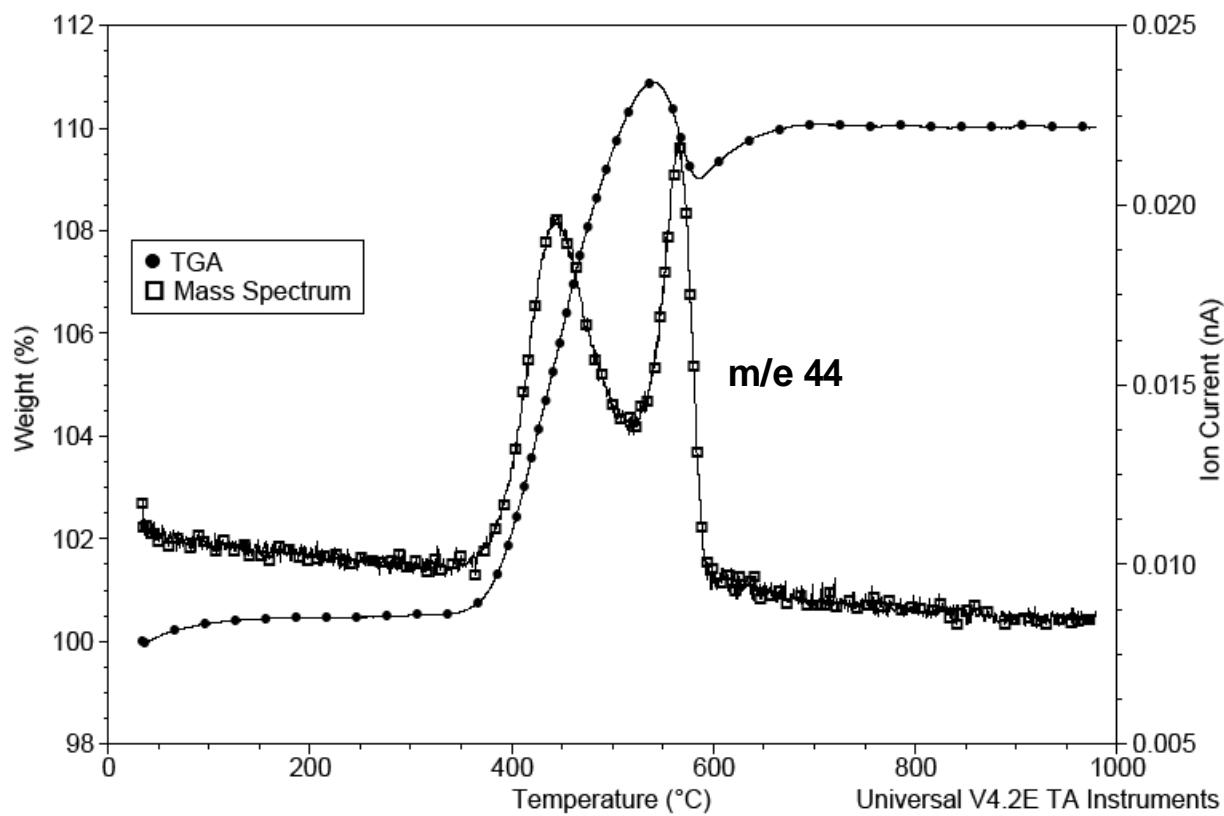

*Figure 3S. TGA and MS curves of Cu@C sample*
